# Supplementary material for: Intestinal Pioneer Colonizers as Drivers of Ileal Microbial Composition and Diversity of Broiler Chickens
Source: Front Microbiol. 2020 Jan 9;10:2858. doi: 10.3389/fmicb.2019.02858 (PMC6962117; doi:10.3389/fmicb.2019.02858)
Supplement: Supplementary file 3 [file Table_2.xlsx]

## Sheet: Pearson Correlation
Table 2: Pearson correlation between the top ileal microbial families and age of broilers
Treatment	Section	Hatch	3d	10d	Pearson's r	p-value
		Enterobacteriaceae
S	UI	0.2844	0.00347553	0.000176676	-0.7382	0.4714
S	LI	0.2844	0.0127736	0.000208454	-0.7575	0.4528
L	UI	0.2716	0.0111	0.0001	-0.7552	0.455
L	LI	0.2716	0.0731	0.0001	-0.8834	0.3105
CF	UI	0.6384	0.1611	0.0001	-0.8749	0.3219
CF	LI	0.6384	0.1549	0.0001	-0.8698	0.3285
C2	UI	0.6714	0.0973	0.0001	-0.8161	0.3923
C2	LI	0.6714	0.1106	0.0022	-0.8259	0.3814
		Ruminococcaceae
S	UI	0.007	0.0022	0.0097	0.5566	0.6242
S	LI	0.007	0.0081	0.0018	-0.8957	0.2934
L	UI	0.0439	0.0017	0.0188	-0.3946	0.7418
L	LI	0.0439	0.0115	0.0111	-0.7385	0.4711
CF	UI	0.0082	0.0019	0.0368	0.893	0.2972
CF	LI	0.0082	0.0043	0.0026	-0.9004	0.2865
C2	UI	0.0207	0.0014	0.0032	-0.6711	0.5316
C2	LI	0.0207	0.0028	0.0032	-0.7178	0.4903
		Lachnospiraceae
S	UI	0.0677	0.0483	0.055	-0.4559	0.6987
S	LI	0.0677	0.114	0.022	-0.6793	0.5246
L	UI	0.1737	0.0476	0.0771	-0.5603	0.6214
L	LI	0.1737	0.0985	0.0362	-0.9608	0.1789
CF	UI	0.0835	0.0164	0.0593	-0.1367	0.9127
CF	LI	0.0835	0.0075	0.0056	-0.7457	0.4642
C2	UI	0.0548	0.0177	0.0271	-0.5431	0.6345
C2	LI	0.0548	0.0268	0.0179	-0.8691	0.3294
		Clostridiaceae
S	UI	0.1892	0.0007	0.0018	-0.7278	0.481
S	LI	0.1892	0.0021	0.0059	-0.7191	0.4891
L	UI	0.0209	0.0009	0.0012	-0.7223	0.4862
L	LI	0.0209	0.0023	0.2664	0.936	0.229
CF	UI	0.0492	0.0008	0.0025	-0.7098	0.4975
CF	LI	0.0492	0.0004	0.0561	0.3343	0.783
C2	UI	0.0076	0.002	0.0042	-0.4075	0.7328
C2	LI	0.0076	0.0047	0.0817	0.9461	0.21
		Lactobacillaceae
S	UI	0.1376	0.3938	0.5049	0.8999	0.2872
S	LI	0.1376	0.3877	0.6852	0.9844	0.1127
L	UI	0.4471	0.4893	0.729	0.9876	0.1002
L	LI	0.4471	0.5125	0.63	0.998	0.04072
CF	UI	0.1038	0.5034	0.5837	0.8289	0.378
CF	LI	0.1038	0.7466	0.6172	0.5881	0.5997
C2	UI	0.0678	0.4616	0.4795	0.757	0.4533
C2	LI	0.0678	0.5296	0.577	0.3621	0.7641
		Enterococcaceae
S	UI	0.036	0.4892	0.347	0.4868	0.6763
S	LI	0.036	0.4319	0.2689	0.3878	0.7465
L	UI	0.0012	0.1623	0.1494	0.6803	0.5237
L	LI	0.0012	0.2298	0.0487	-0.0288	0.9817
CF	UI	0.00107709	0.2071	0.2908	0.8934	0.2967
CF	LI	0.00107709	0.0549	0.3159	0.9907	0.0867
C2	UI	0.003	0.0618	0.4688	0.9838	0.1149
C2	LI	0.003	0.131	0.3476	0.9968	0.05067
saline (S), LAB-probiotic (L), Citrobacter freundii (CF) or Citrobacter spp. (C2)
UI (upper ileum), LI (lower ileum)
